# Supplementary material
Source: publisher site journal article supplement (https://www.kjim.org/upload/media/kjim-2023-523-Supplementary-Table-1.pdf)
Supplement: Supplementary file 1 [file kjim-2023-523-Supplementary-Table-1.pdf]

**Supplementary Table 1. Reference ranges for hormone tests**

| Hormone                                          | Reference range |
|--------------------------------------------------|-----------------|
| TSH ( $\mu\text{U/mL}$ )                         | 0.4–5.0         |
| Free T4 ( $\text{ng/dL}$ )                       | 0.8–1.9         |
| ACTH ( $\text{pg/mL}$ )                          | < 60            |
| Cortisol ( $\mu\text{g/dL}$ )                    |                 |
| Morning (8:00 AM)                                | 5–25            |
| At 60 minutes after corticotropin administration | > 18            |
| IGF-1 ( $\text{ng/mL}$ ), age group (yr)         |                 |
| 20–30                                            | 219–644         |
| 30–40                                            | 140–405         |
| 40–50                                            | 64–336          |
| 50–60                                            | 71–284          |
| 60–70                                            | 94–269          |
| $\geq 70$                                        | 72–167          |
| hGH ( $\text{ng/mL}$ )                           | 0–9.9           |
| FSH ( $\text{mIU/mL}$ )                          |                 |
| Men                                              | 1.3–8.1         |
| Premenopausal women                              | 1.2–33.1        |
| Postmenopausal women                             | 27.7–93.3       |
| LH ( $\text{mIU/mL}$ )                           |                 |
| Men                                              | 1.0–5.3         |
| Premenopausal women                              | 0.5–41.1        |
| Postmenopausal women                             | 14.4–52.8       |
| Testosterone, male ( $\text{ng/mL}$ )            | 2.5–10.6        |
| Estradiol ( $\text{pg/mL}$ )                     |                 |
| Premenopausal women                              | 25–450          |
| Postmenopausal women                             | < 35.0          |
| Prolactin ( $\text{ng/mL}$ )                     |                 |
| Male                                             | 1.8–15.9        |
| Premenopausal women                              | 2.7–19.7        |
| Postmenopausal women                             | 1.9–17.9        |

TSH, thyroid-stimulating hormone; T4, thyroxine; ACTH, adrenocorticotrophic hormone; IGF-1, insulin-like growth factor; hGH, human growth hormone; FSH, follicle-stimulating hormone; LH, luteinizing hormone.

The reference ranges for all tests conformed to the standards of the Department of Laboratory Medicine at Asan Medical Center in Seoul, Korea.
